# Supplementary material for: pH-Sensitive Amphiphilic Diblock Polyphosphoesters with Lactate Units: Synthesis and Application as Drug Carriers
Source: MDPI journal article supplement (doi:10.3390/ijms25084518), 2024-04-20
Supplement: s1 [file s1]

# pH - Sensitive Amphiphilic Diblock Polyphosphoesters with Lactate Units: Synthesis and Application as Drug Carriers

Kasumi Mochizuki<sup>1</sup>, Violeta Mitova<sup>3</sup>, Kimiko Makino<sup>1</sup>, Hiroshi Terada<sup>1†</sup>, Issei Takeuchi<sup>1,2</sup>,  
and Kolio Troev<sup>1,3\*</sup>

<sup>1</sup> Faculty of Pharmaceutical Sciences, Tokyo University of Science, 2641, Yamazaki, Noda 278-8510, Chiba, Japan

<sup>2</sup> Faculty of Pharmaceutical Science, Josai International University, 1 Gumyo, Togane 283-8555, Chiba, Japan

<sup>3</sup> Institute of Polymers, Bulgarian Academy of Sciences, 1113 Sofia, Bulgaria

\*Correspondence: [ktroev@polymer.bas.bg](mailto:ktroev@polymer.bas.bg) (K.T.)

† Deceased author.

## Supplementary data

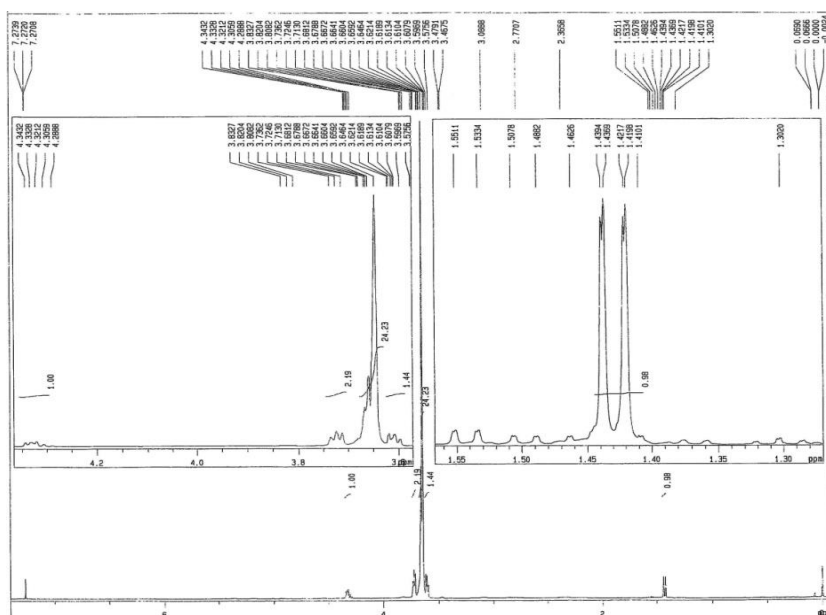

**Figure S1.** <sup>1</sup>H NMR spectrum of the reaction product obtained from poly(ethylene glycol) and ethyl lactate.

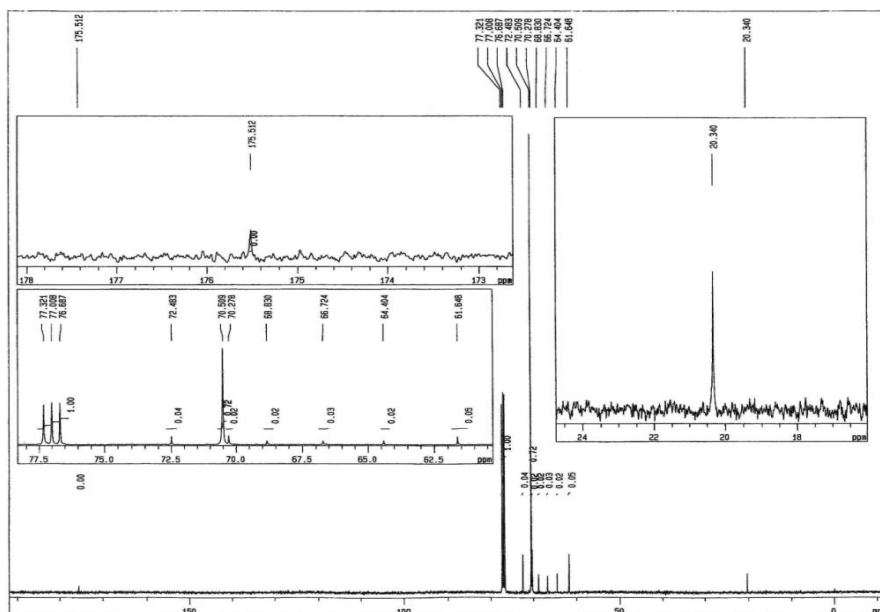

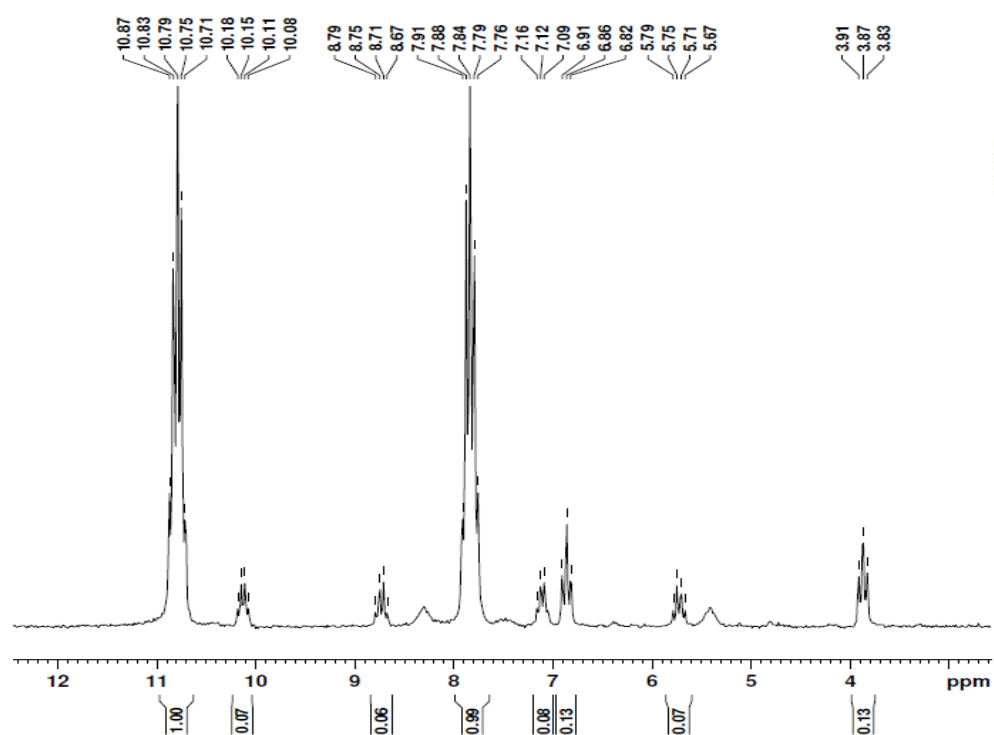

**Figure S4.**  $^{31}\text{P}$ -NMR spectra of poly[poly(ethylene glycol) H-phosphonate-*b*-poly(ethylene glycol)lactate H-phosphonate] in  $\text{CDCl}_3$ .

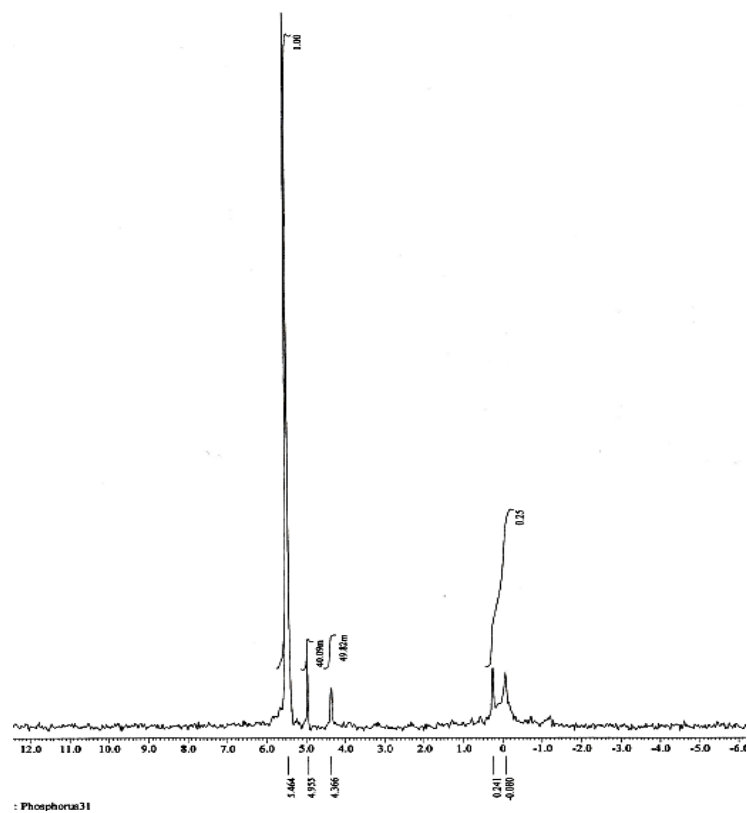

**Figure S5.**  $^{31}\text{P}\{^1\text{H}\}$ -NMR spectra of poly[poly(ethylene glycol Cl-phosphate)-*b*-poly(ethylene glycol) lactate Cl-phosphate] in  $\text{CDCl}_3$ .

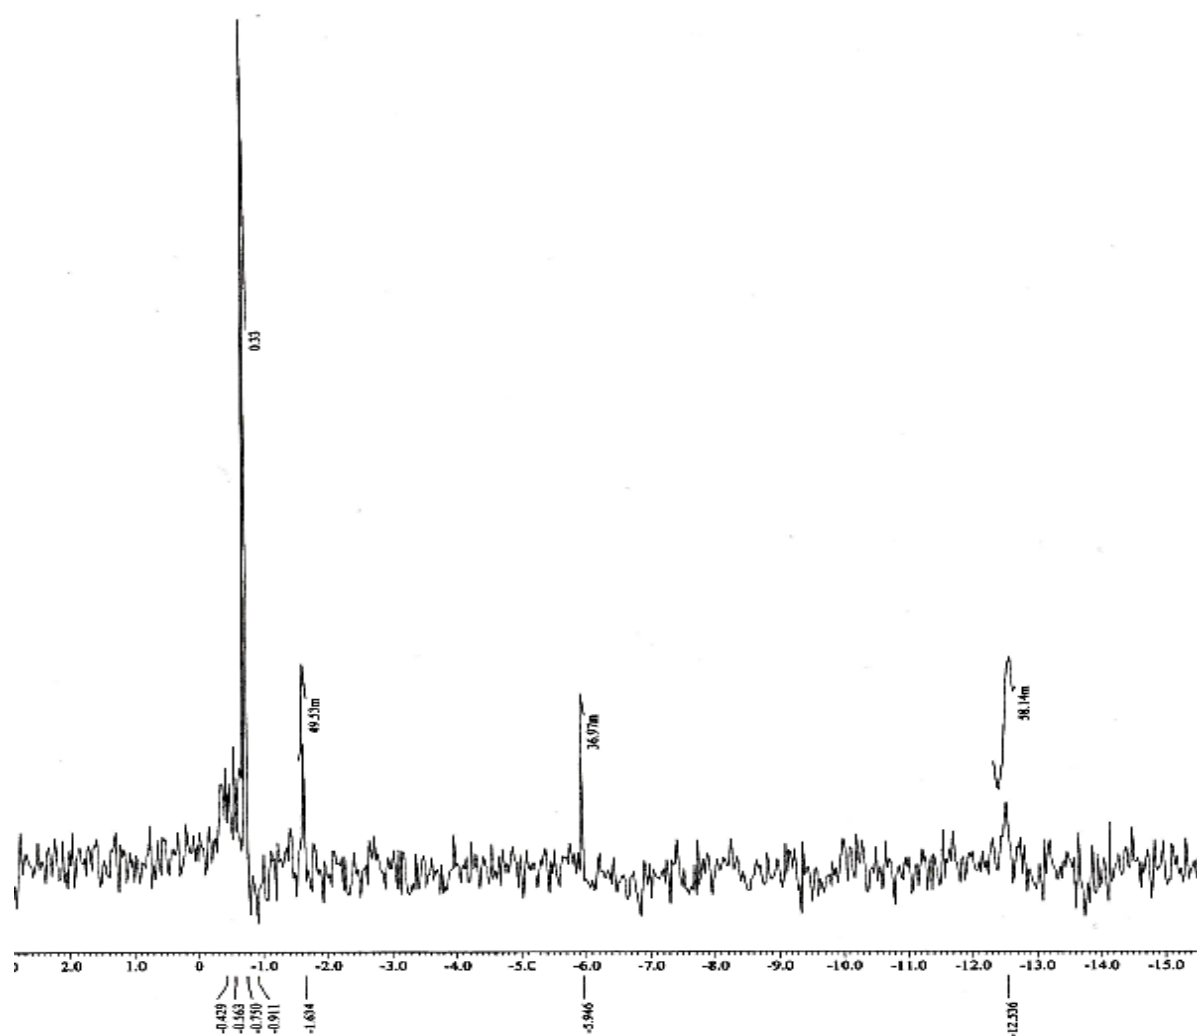

**Figure S6.**  $^{31}\text{P}$ -NMR spectra of poly[hexadecylpoly(ethylene glycol) phosphate-b-hexadecylpoly(ethylene glycol)lactate phosphate] in  $\text{CDCl}_3$

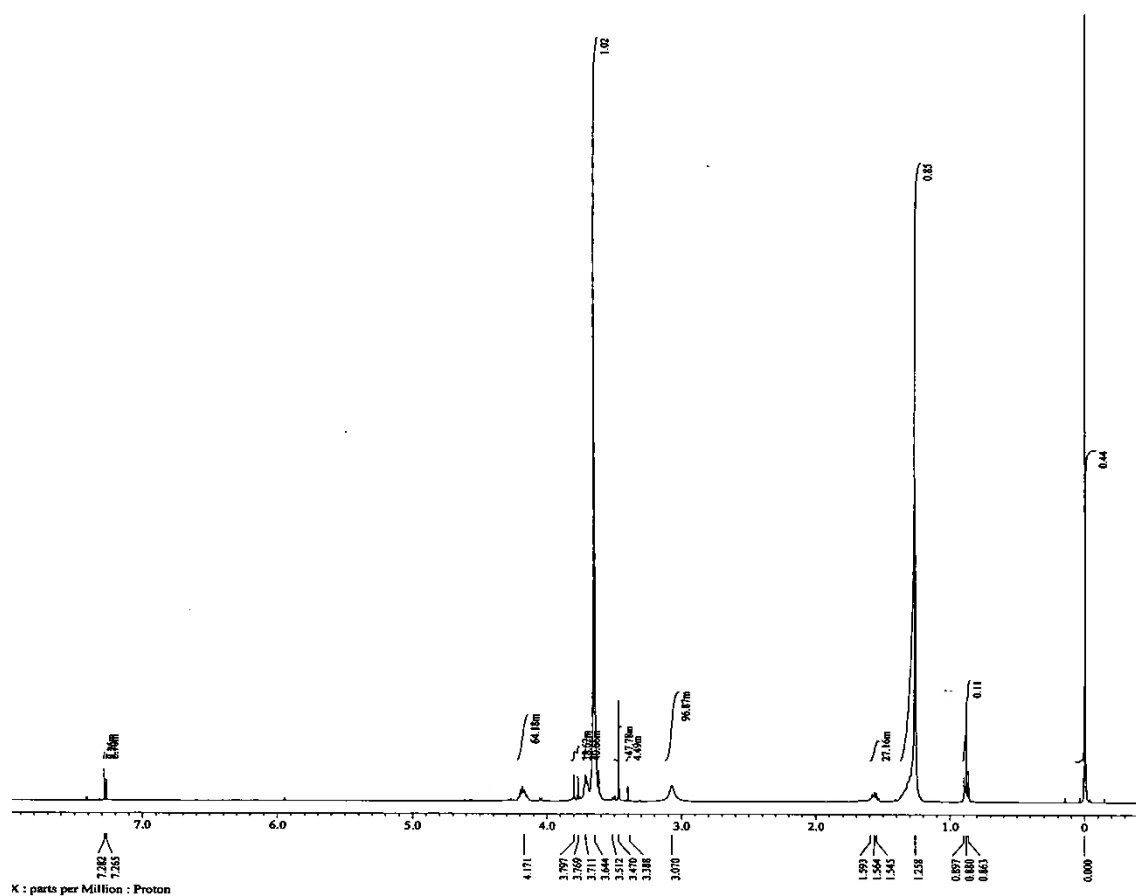

**Figure S7.**  $^1\text{H}$ -NMR spectra of poly[hexadecylpoly(ethylene glycol) phosphate- *b*- hexadecylpoly(ethylene glycol)lactate phosphate) in  $\text{CDCl}_3$ .
